# Supplementary figures and images for: Climate Change Responses of High-Elevation Polylepis Forests
Source: MDPI journal article supplement (doi:10.3390/f15050811), 2024-05-04

A

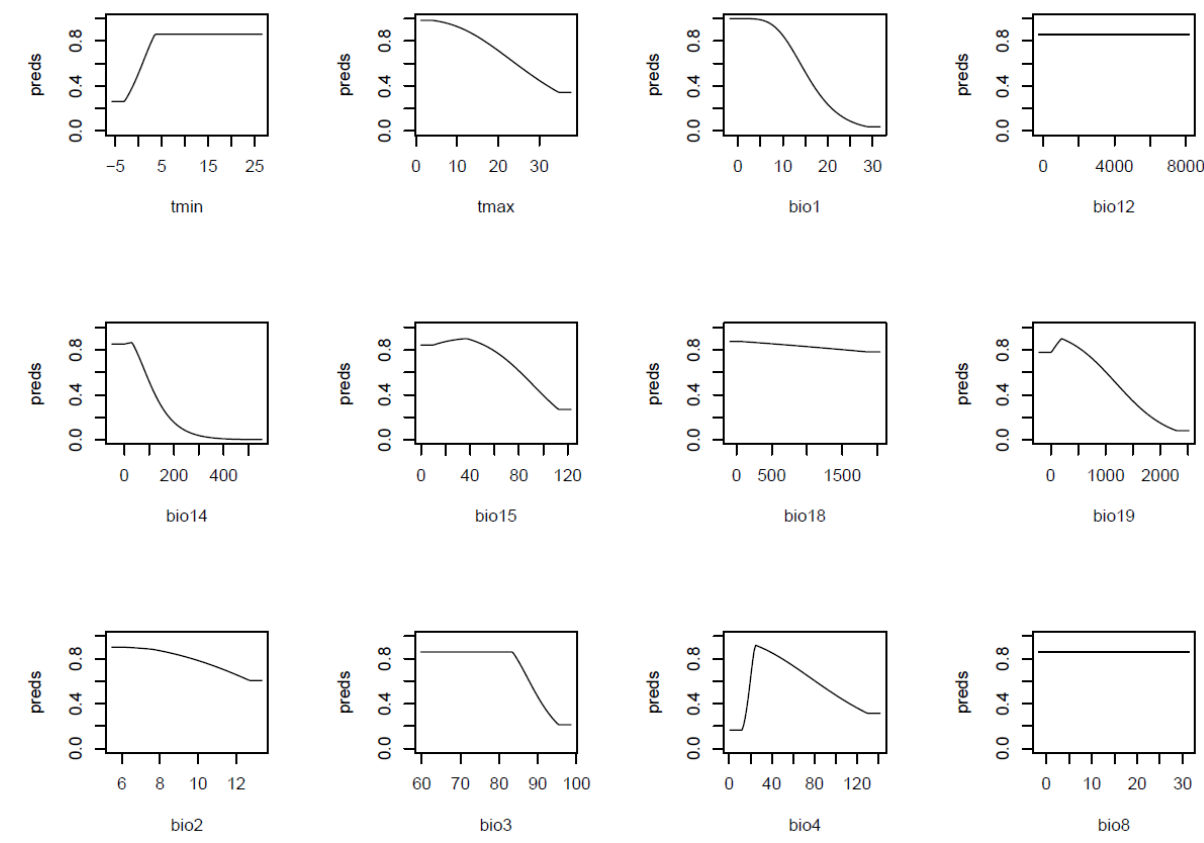

B

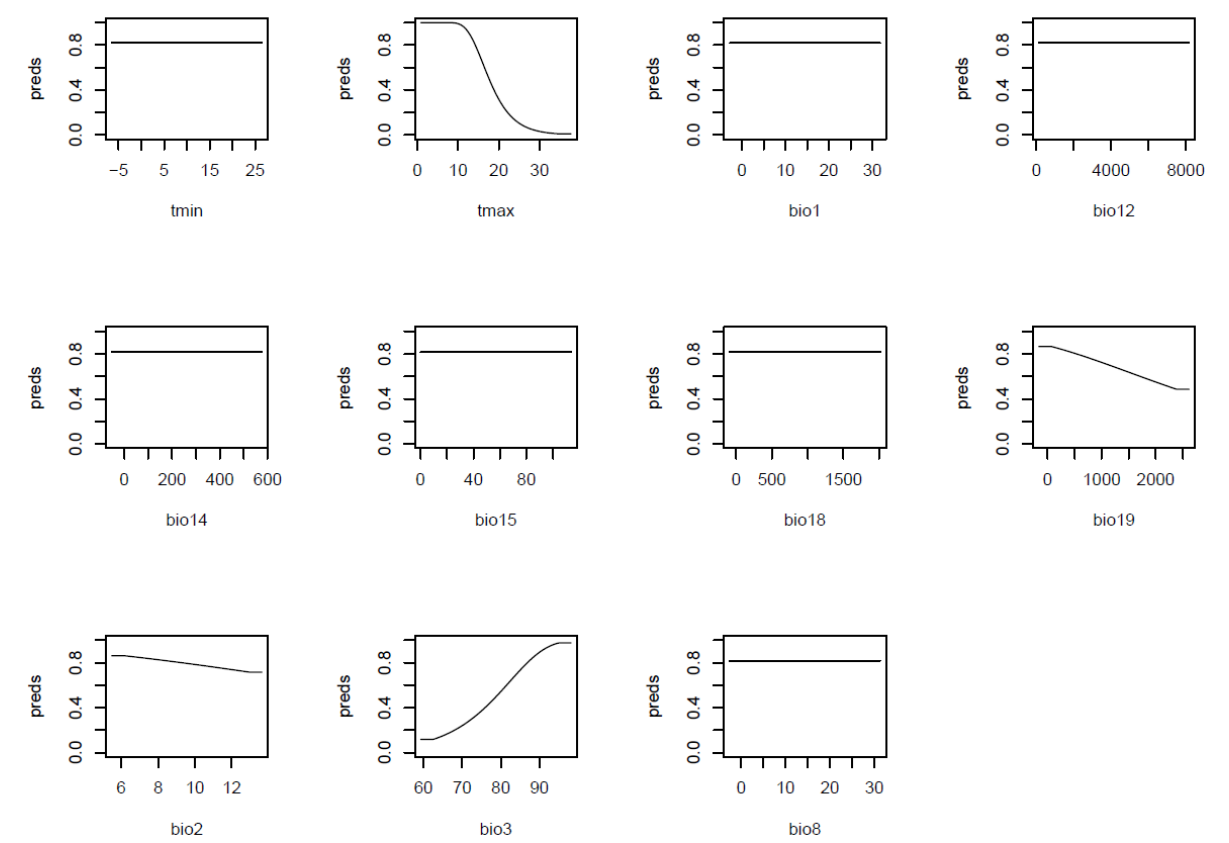

Supplement: s1 [file s1]
